# Supplementary material
Source: PubMed Central journal article supplement (PMC4613760)

Figure S1

**A**

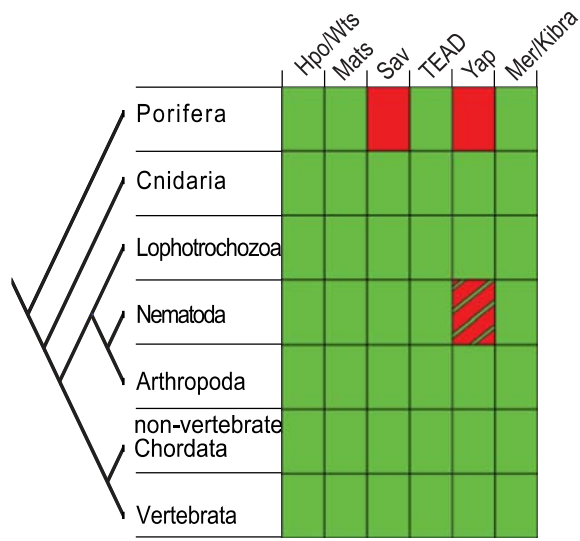

**B**

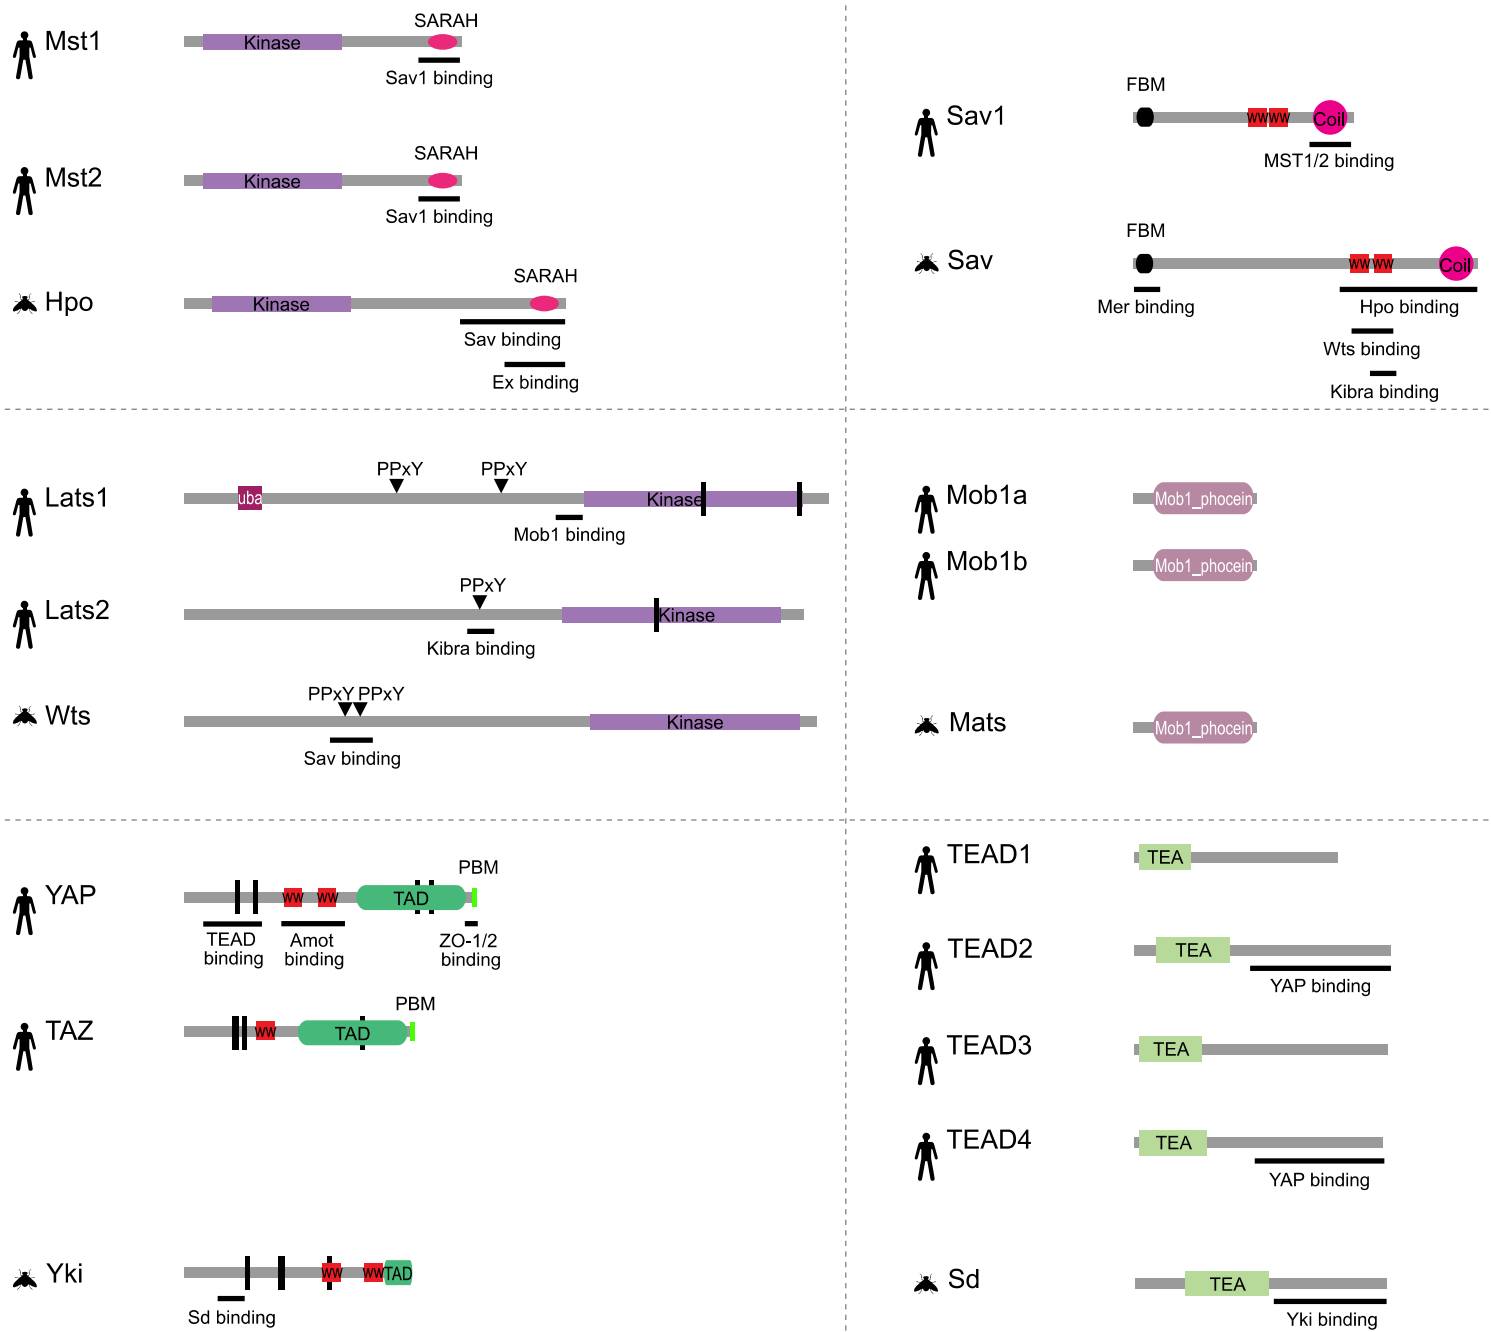

1000 aa

Supplement: NIHMS724827-supplement-S1_fig.pdf [file NIHMS724827-supplement-S1_fig.pdf]

Figure S2

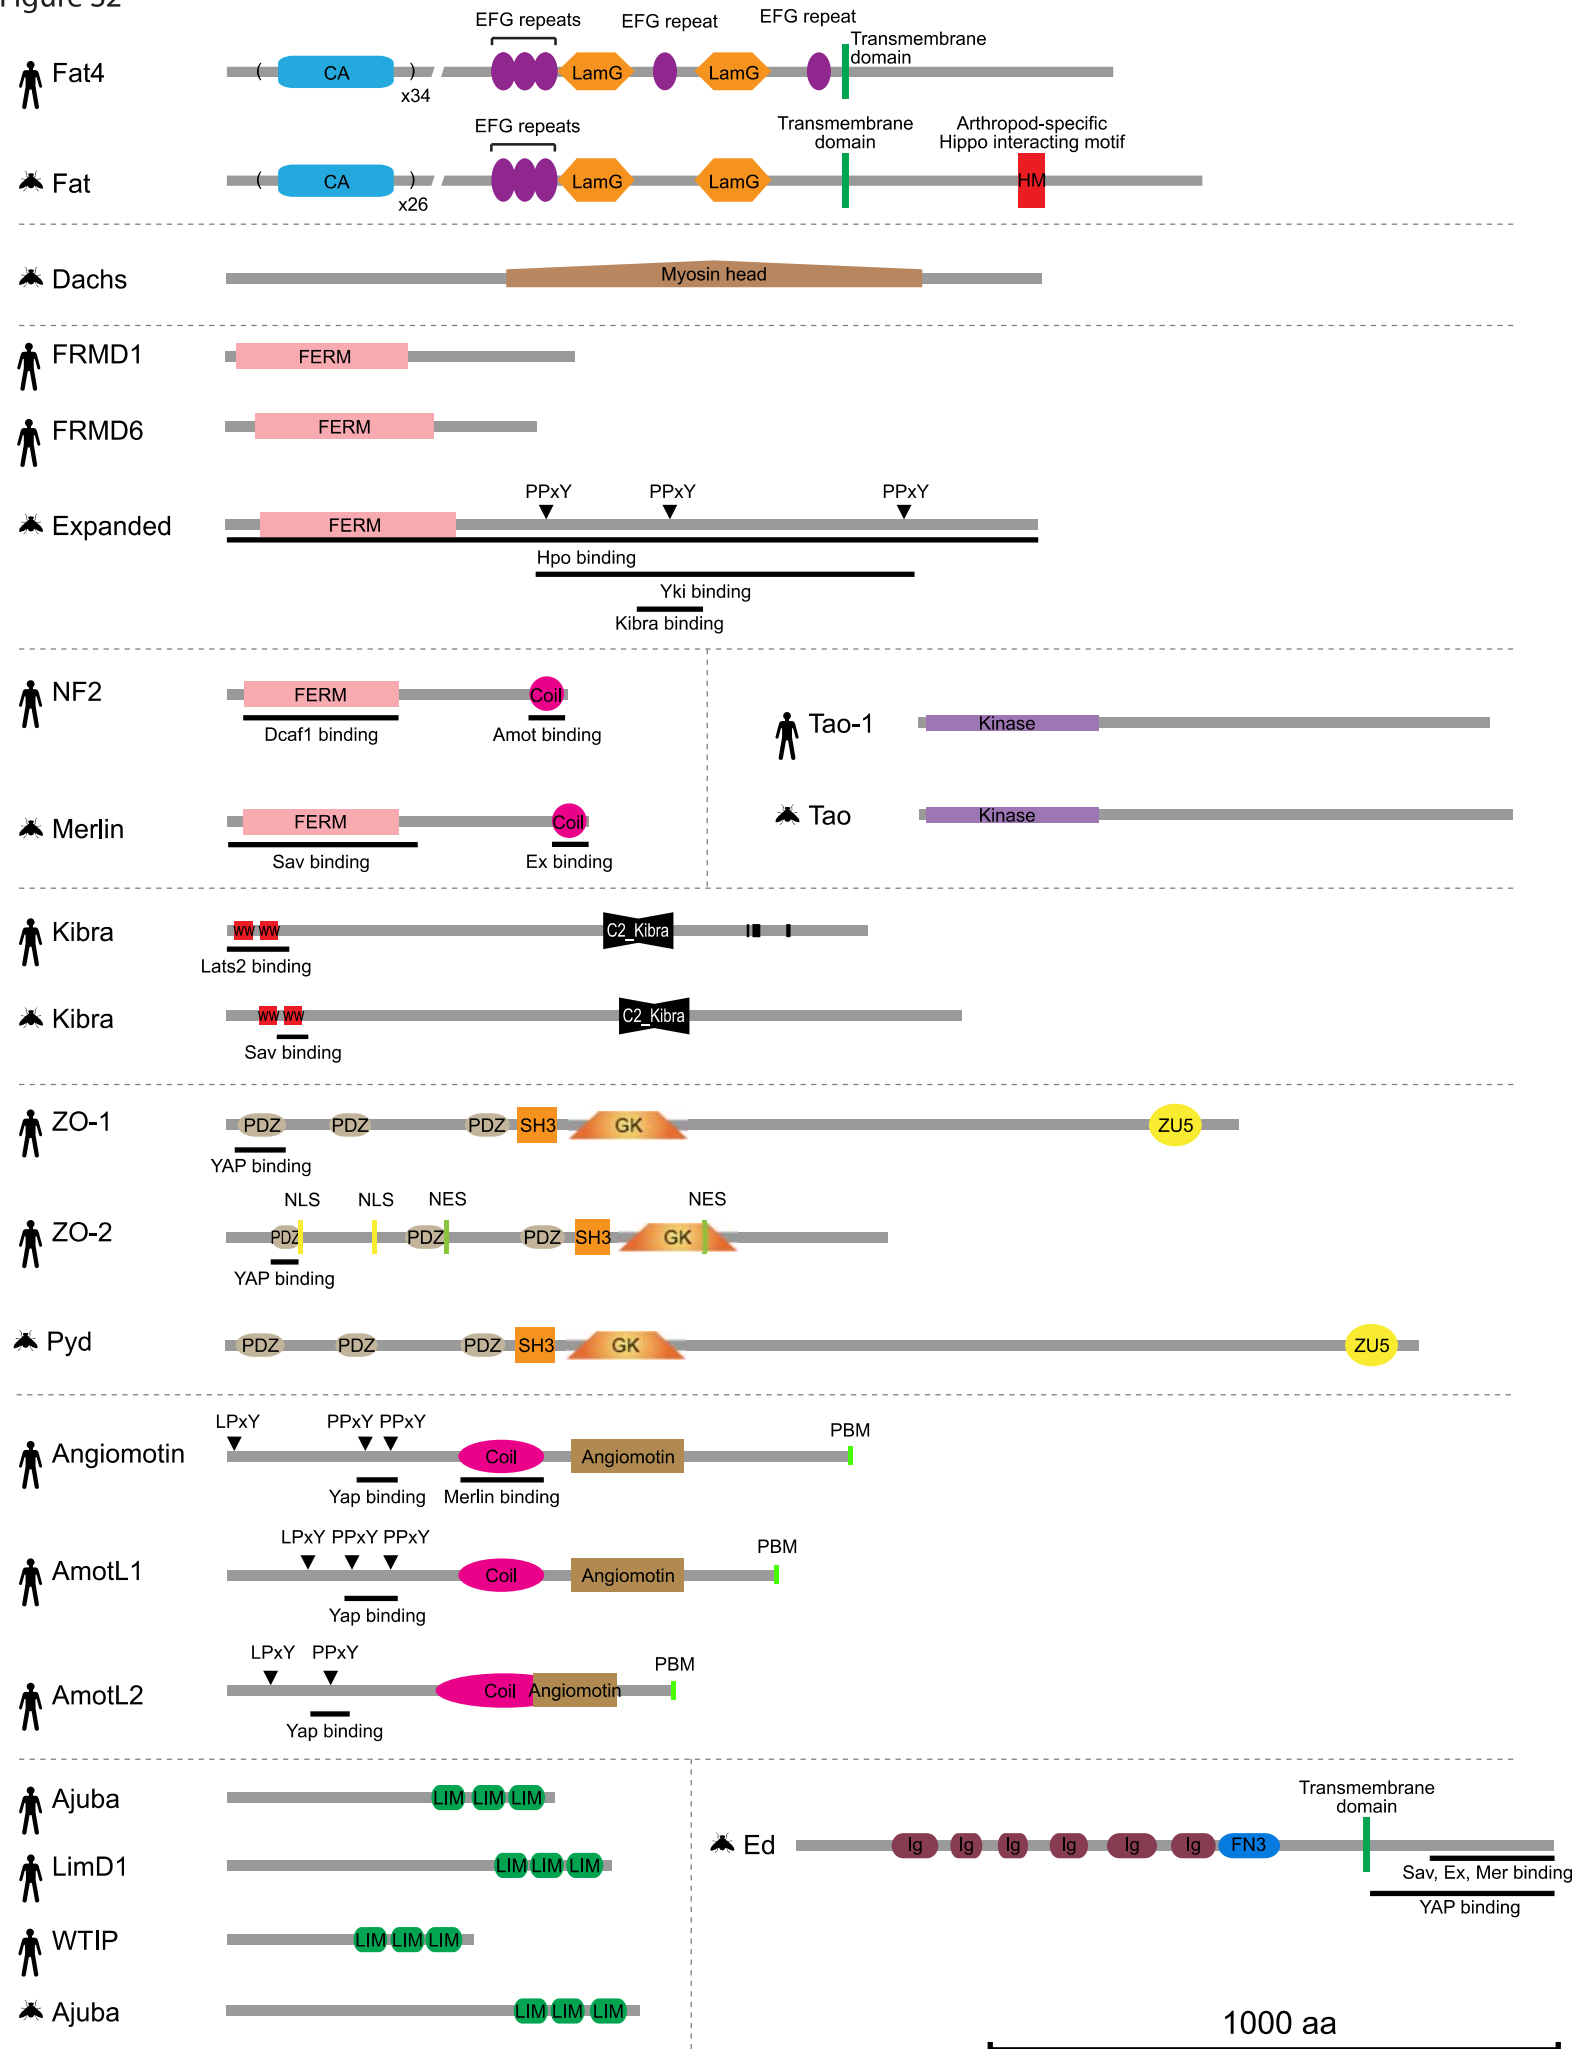

Supplement: NIHMS724827-supplement-S2_fig.pdf [file NIHMS724827-supplement-S2_fig.pdf]

Figure S3

Fat<sup>ICD</sup>

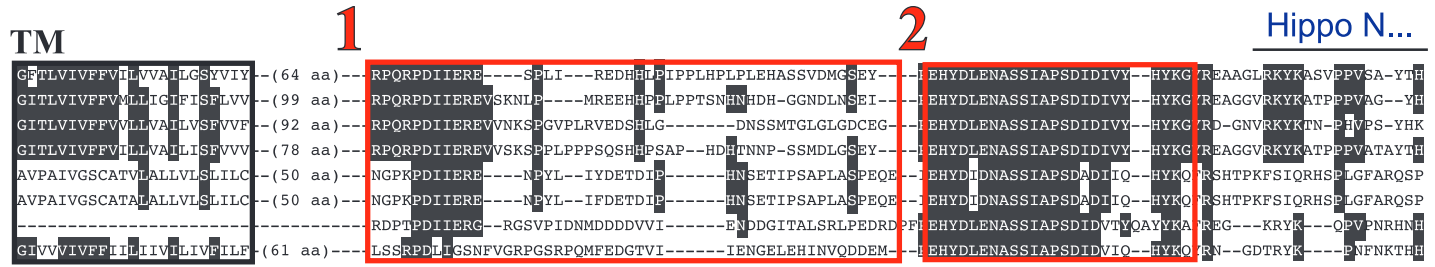

...Hippo N

Hippo C...

### 3: HM 4852 Ile→Asn in Ft<sup>sum</sup>

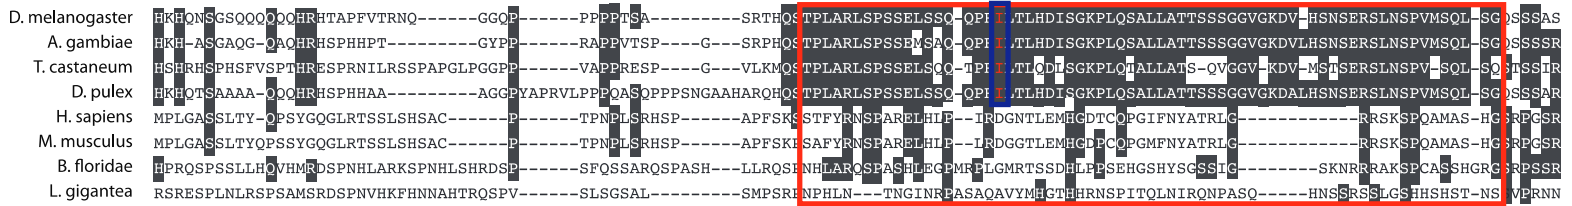

...Hippo C

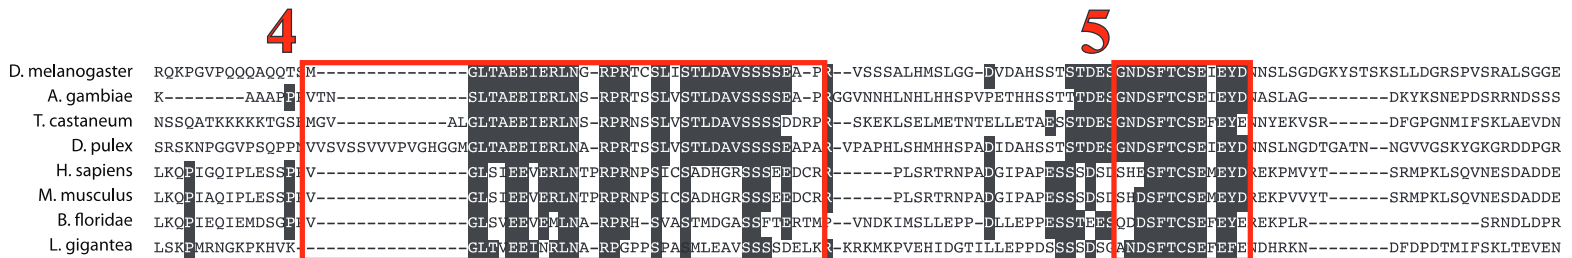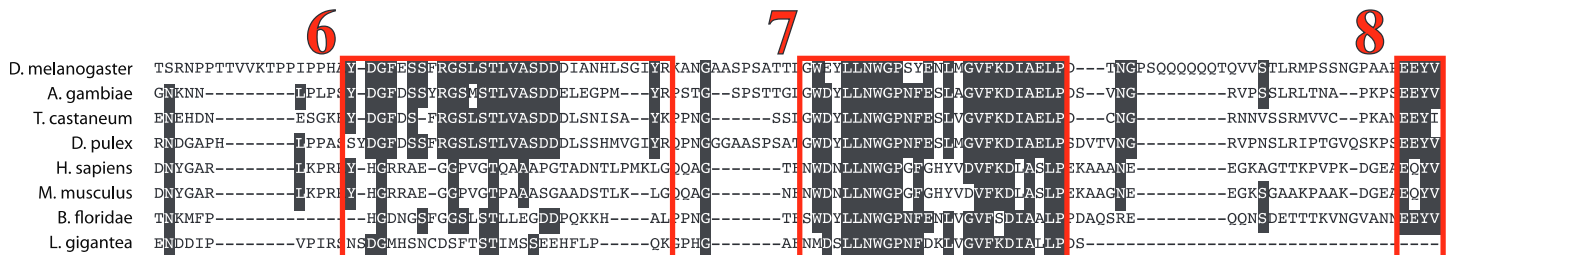

Supplement: NIHMS724827-supplement-S3_fig.pdf [file NIHMS724827-supplement-S3_fig.pdf]

Figure S4

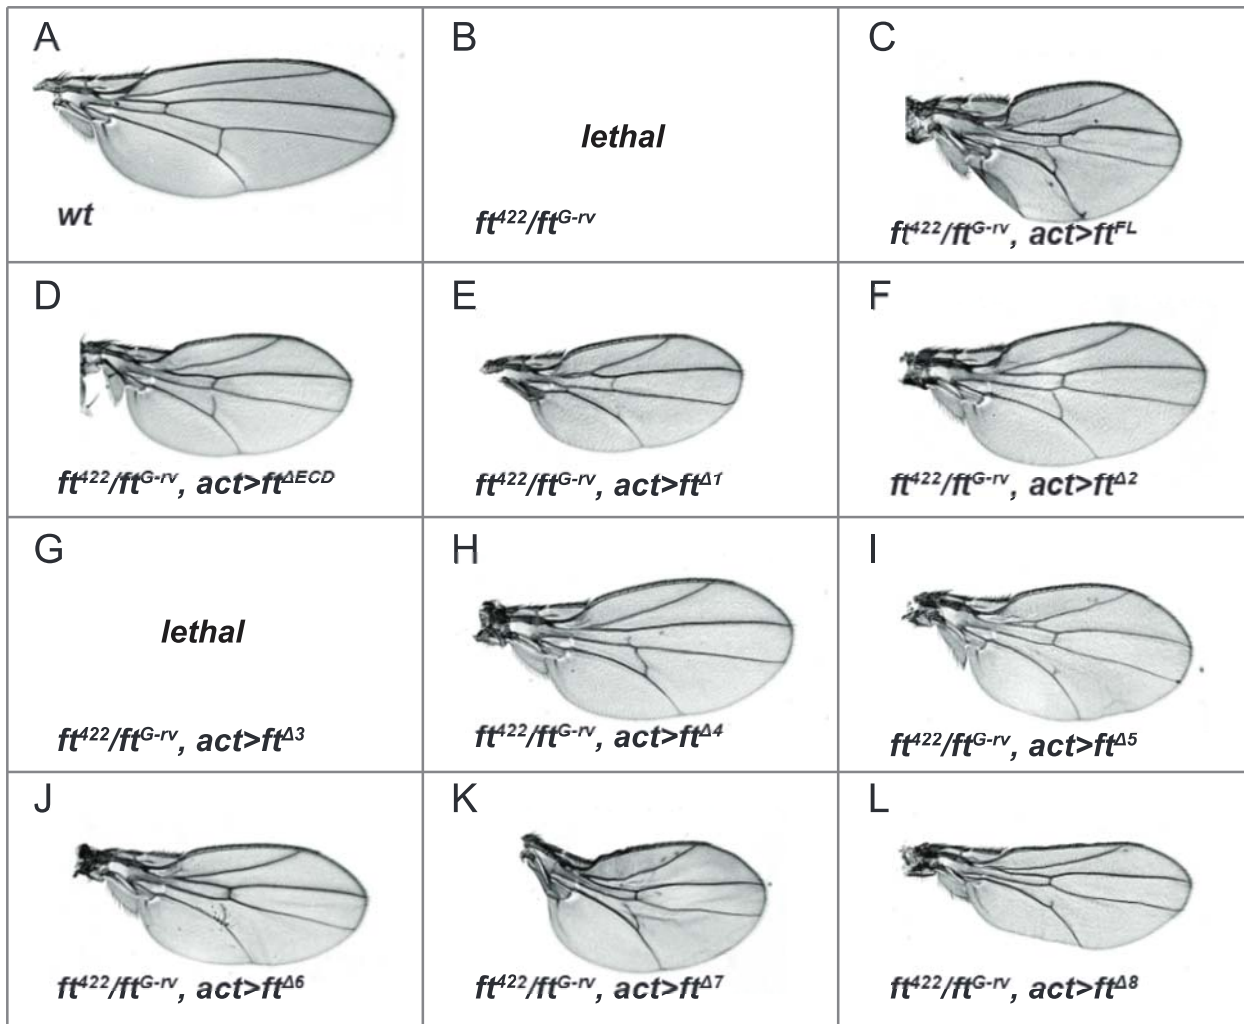

Supplement: NIHMS724827-supplement-S4_fig.pdf [file NIHMS724827-supplement-S4_fig.pdf]

Figure S5

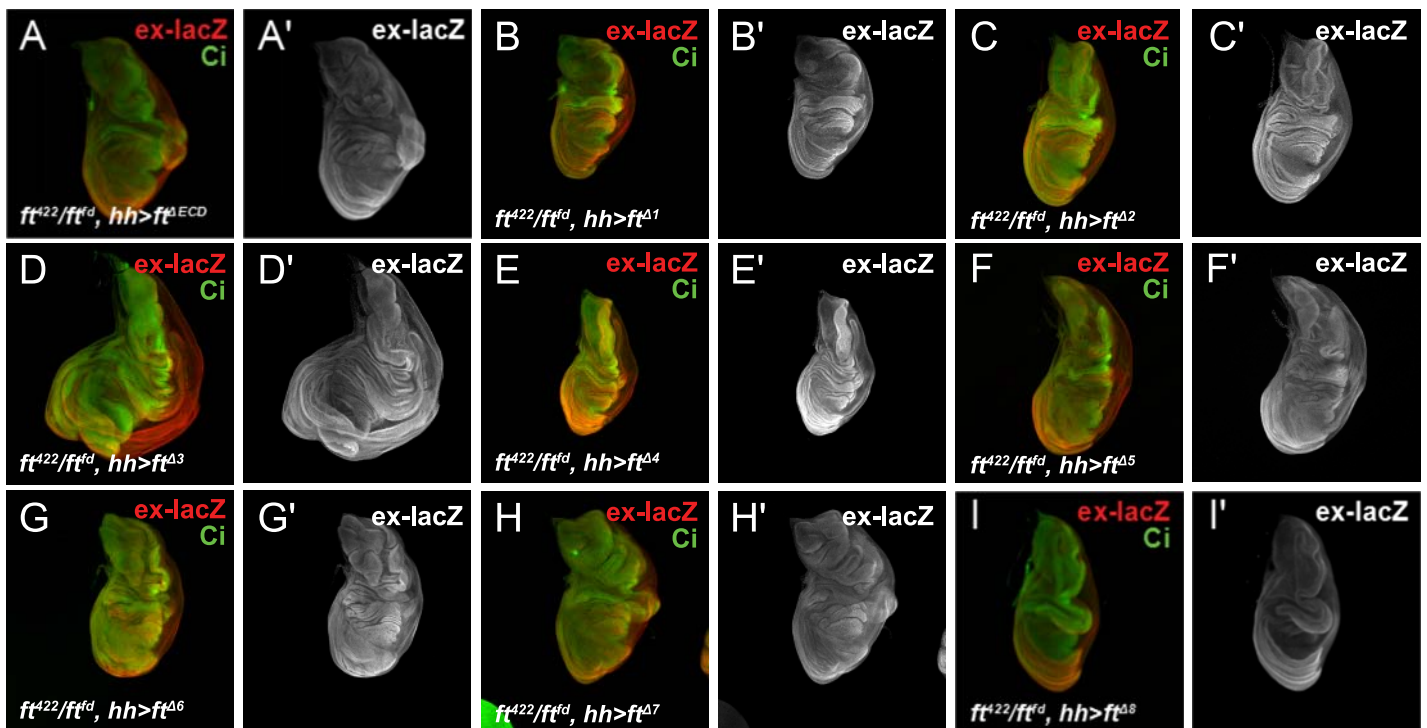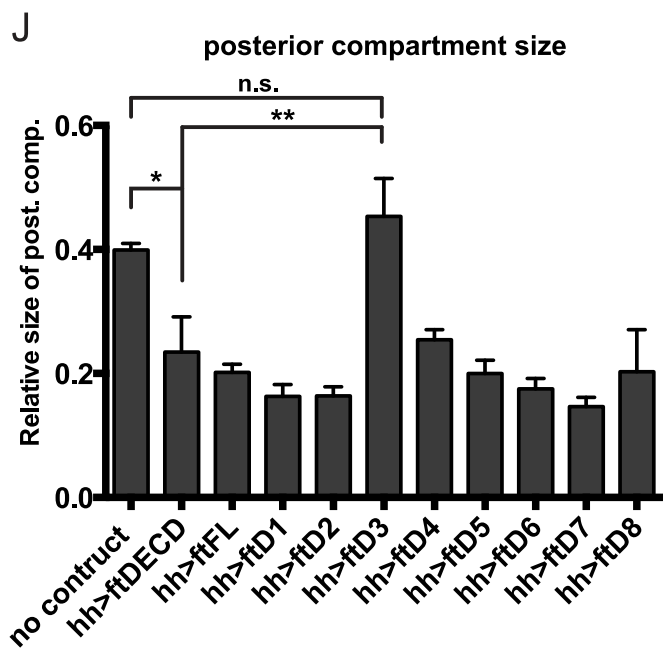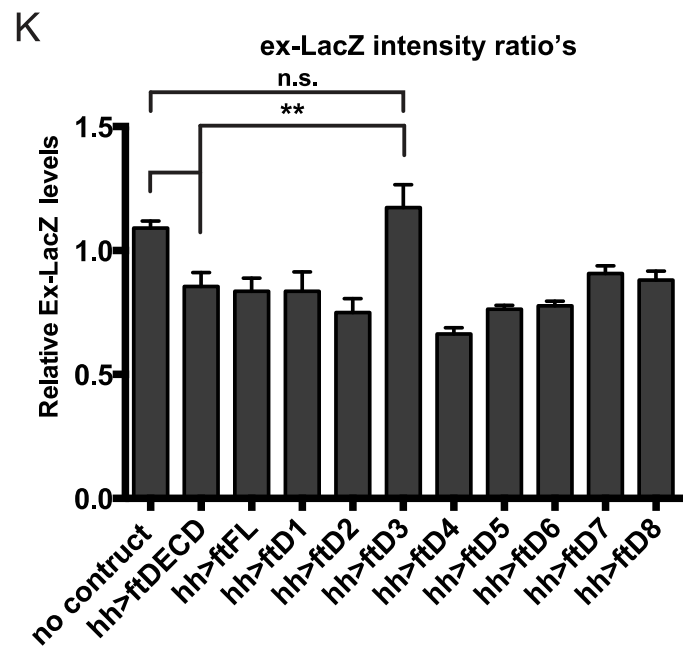

Supplement: NIHMS724827-supplement-S5_fig.pdf [file NIHMS724827-supplement-S5_fig.pdf]

Figure S6

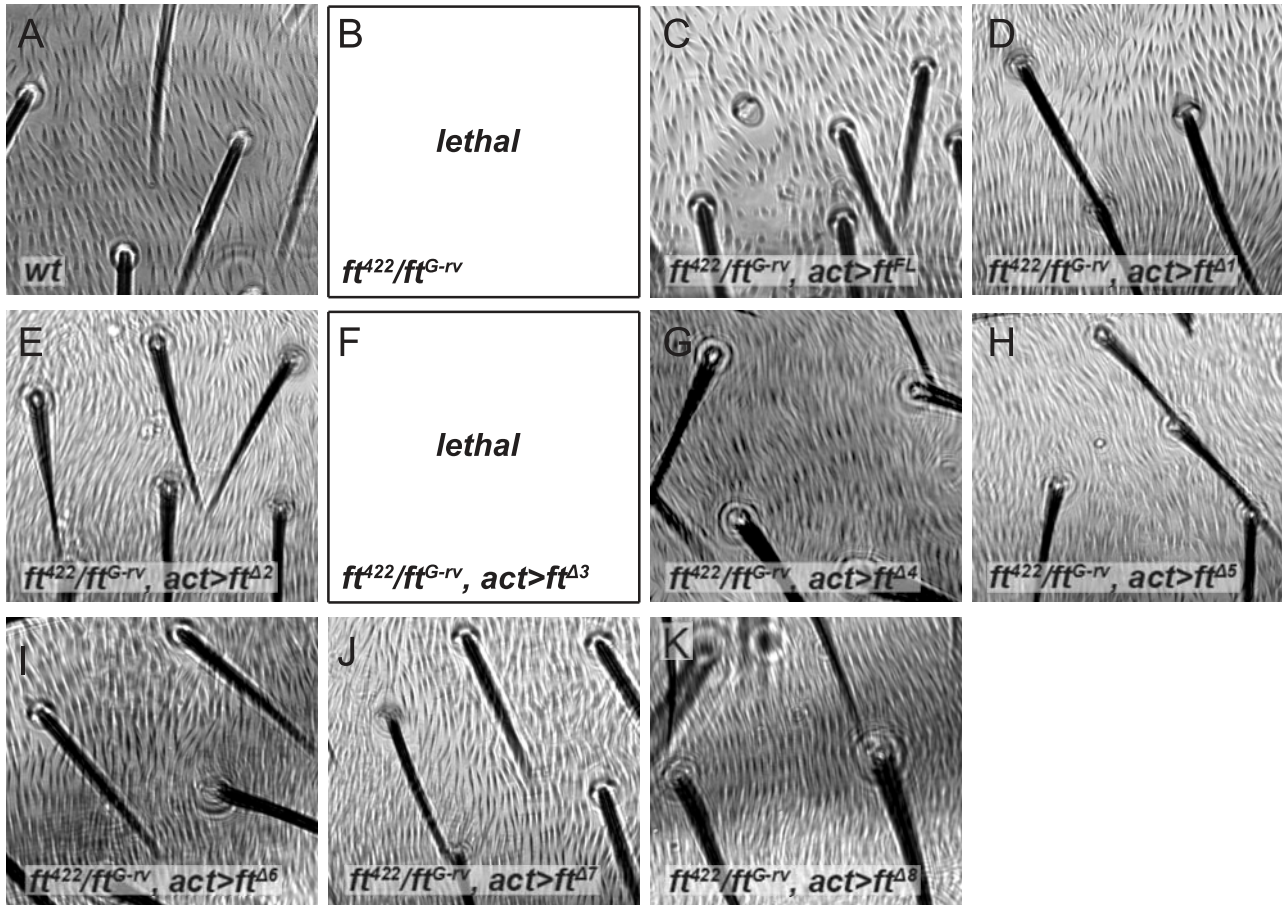

Supplement: NIHMS724827-supplement-S6_fig.pdf [file NIHMS724827-supplement-S6_fig.pdf]

Figure S7

# polydot plot Expanded Homologs

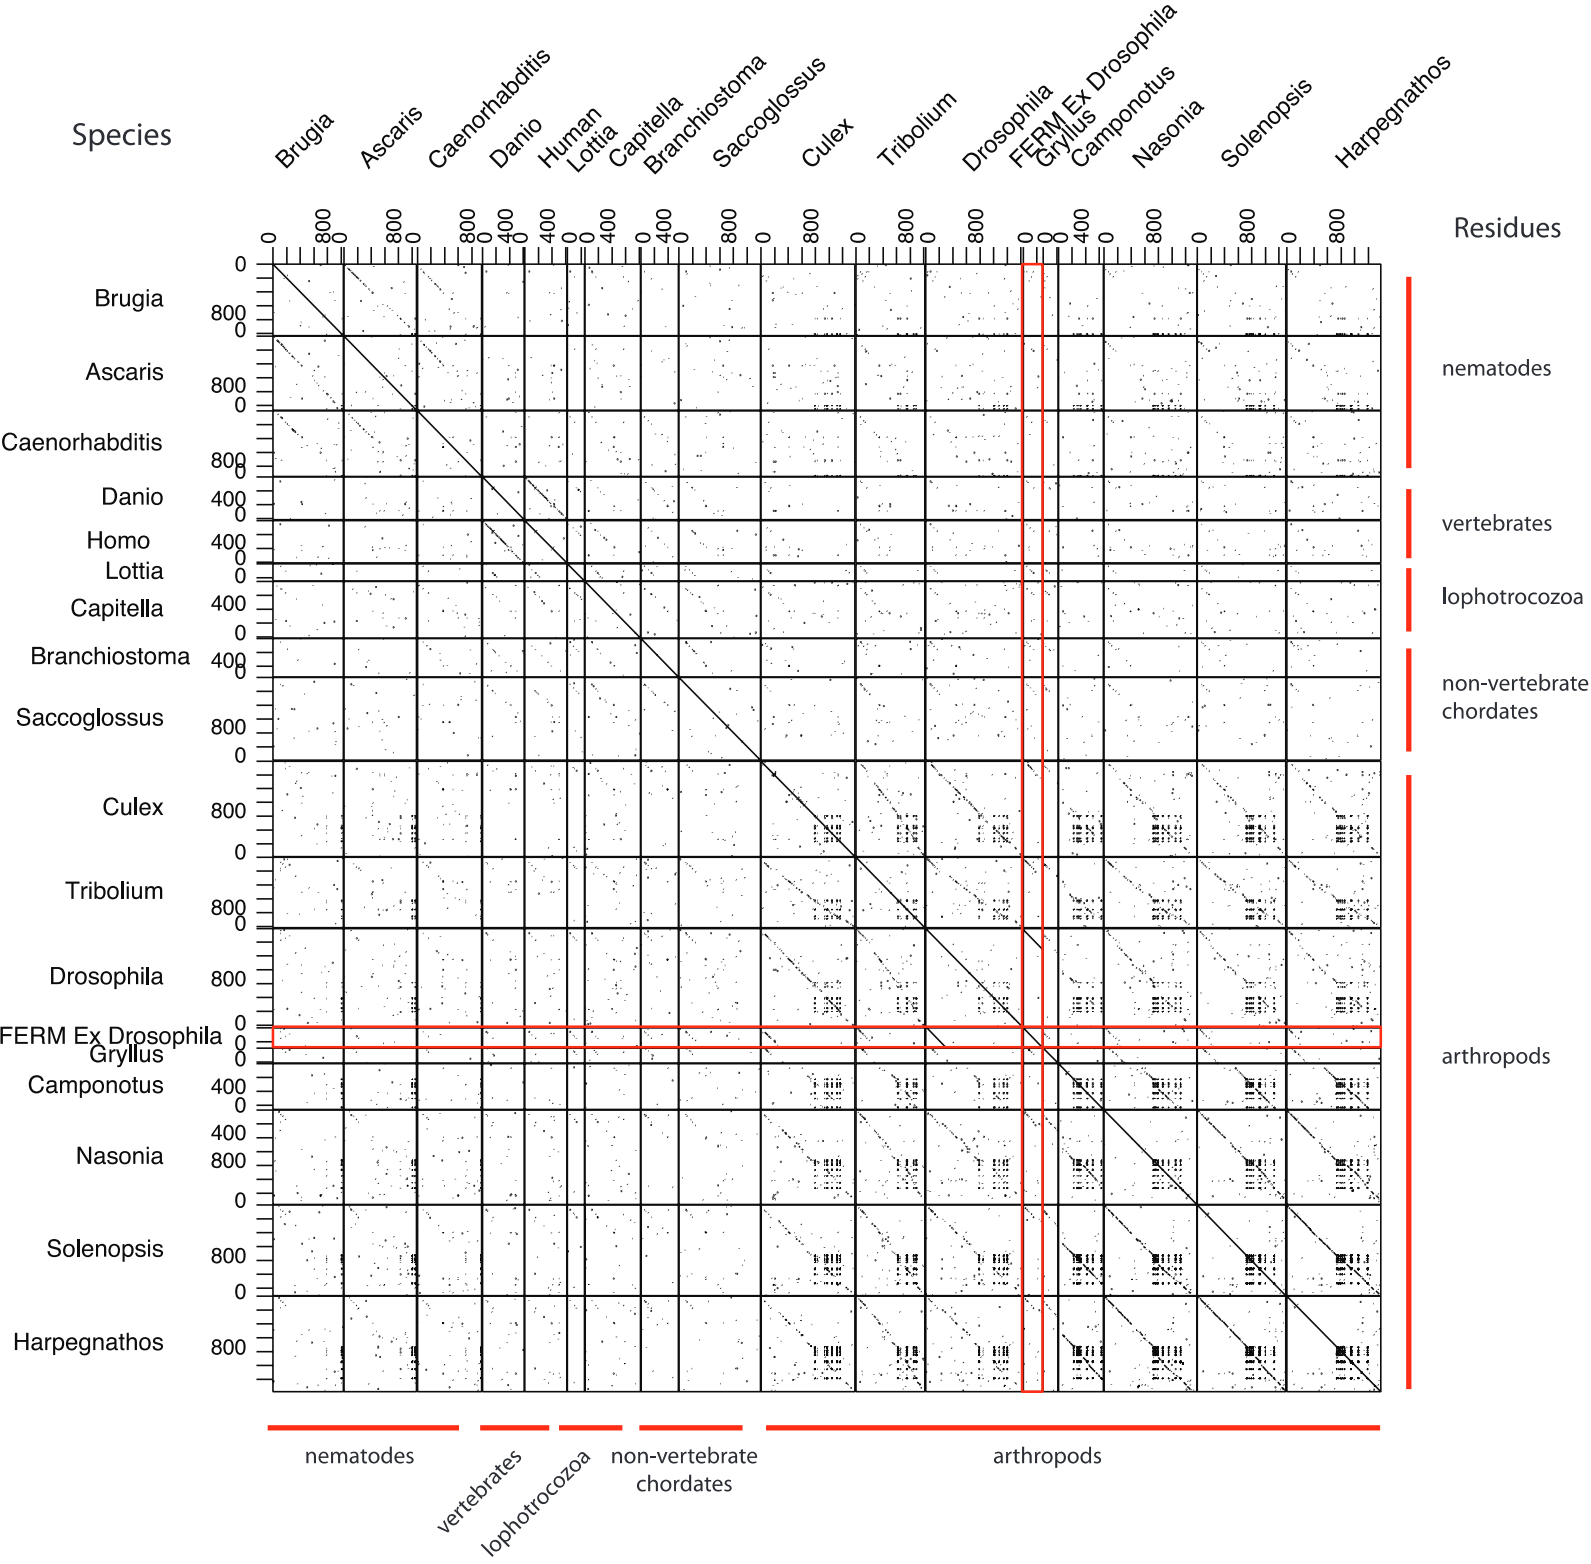

Supplement: NIHMS724827-supplement-S7_Fig.pdf [file NIHMS724827-supplement-S7_Fig.pdf]
